# Supplementary material for: Three-dimensional reduced graphene oxide aerogel stabilizes molybdenum trioxide with enhanced photocatalytic activity for dye degradation
Source: Royal Society of Chemistry journal article supplement (doi:10.1039/c9ra08372c), 2019-01-01
Supplement: c9ra08372c1.pdf [file c9ra08372c1.pdf]

# Three-dimensional reduced graphene oxide aerogel stabilizes molybdenum trioxide with enhanced photocatalytic activity for dye degradation

Ting Wu<sup>1,†</sup>, Bo Zhang<sup>2,†,\*</sup>, Zhimin Wu<sup>3,\*</sup>, Jinglin Zhang<sup>1</sup>, Huidi Liu<sup>5</sup>, Shaobin Yu<sup>4</sup>,  
Zhihao Huang<sup>1</sup> and Xiang Cai<sup>1,\*</sup>

†T. Wu and B. Zhang contributed equally to this article.

<sup>1</sup> Department of Light Chemical Engineering, Guangdong Polytechnic, Foshan 528041, P. R. China

<sup>2</sup> School of Metallurgical and Material Engineering, Hunan University of Technology, Zhuzhou 412007, P. R. China

<sup>3</sup> Human Resource Office, Guangdong Polytechnic, Foshan 528041, P. R. China

<sup>4</sup> The No.1 Surgery Department of No.5 People's Hospital of Foshan, Foshan 528211, P. R.China

<sup>5</sup> Scientific Research Office, Guangdong Polytechnic, Foshan 528041, P. R. China

\* Corresponding Authors:

E-mail addresses: 13747@hut.edu.cn (B. Zhang); carrybeyond@126.com (Z. Wu);  
cecaixiang@163.com (X. Cai)

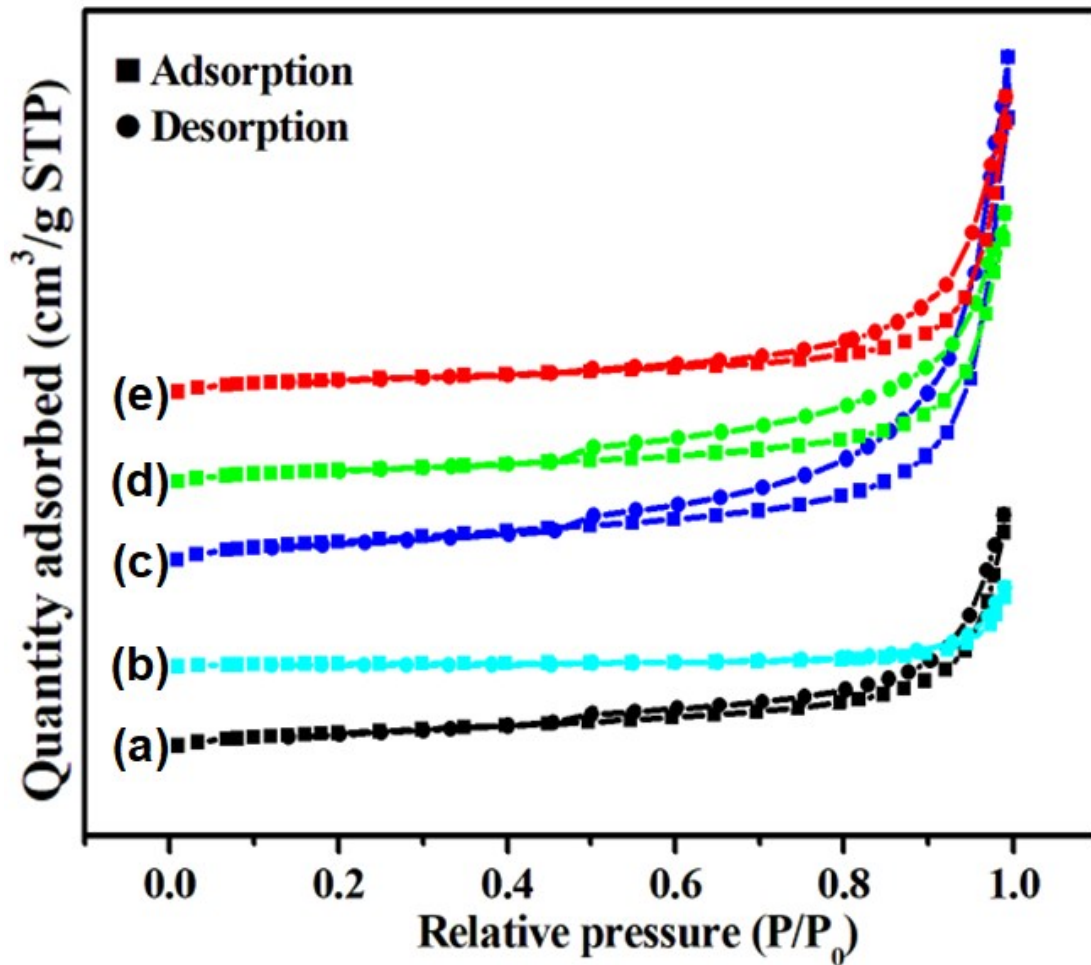

Fig. S1 Nitrogen adsorption-desorption isotherms (measured at 77 k) of (a) rGO aerogel, (b) rGO-MoO<sub>3</sub> (3:1) aerogel, (c) rGO-MoO<sub>3</sub> (4:1) aerogel, (d) rGO-MoO<sub>3</sub> (5:1) aerogel, and (e) rGO-MoO<sub>3</sub> (6:1) aerogel.

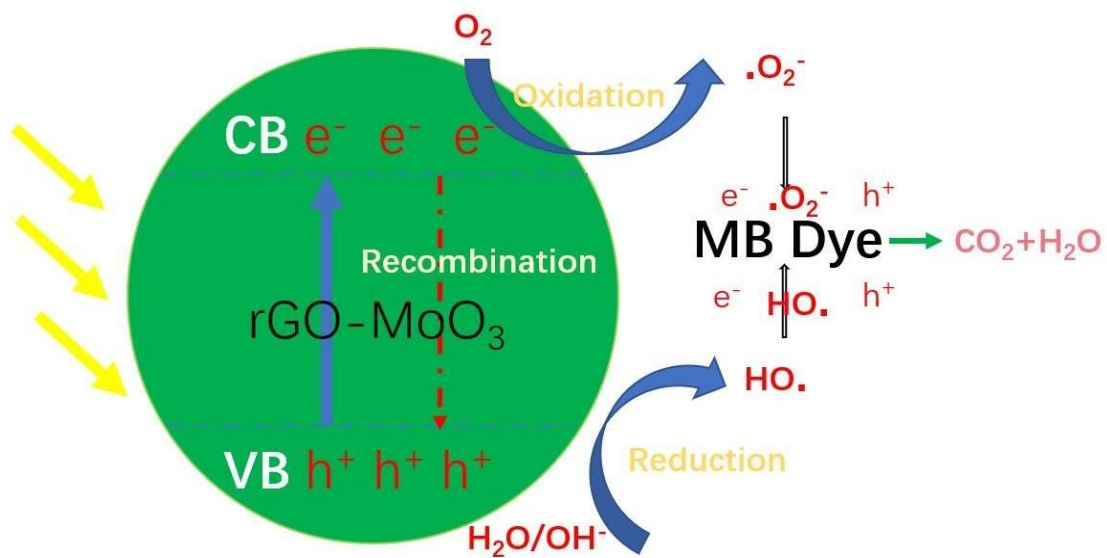

**Fig. S2** The possible pathway for the photoelectron excited and transfer in rGO-MoO<sub>3</sub> aerogel under visible light irradiation.
